# Supplementary material
Source: PubMed Central journal article supplement (PMC3474343)
Supplement: NIHMS410509-supplement-Supplementary_Data.pdf [file NIHMS410509-supplement-Supplementary_Data.pdf]

## APPENDICES

### Appendix A: Comparison of participant characteristics between the current cohort and the full study cohort of the *HIM Study*.

| Characteristics                             | Current Cohort | Full <i>HIM</i> Cohort | p values <sup>†</sup> |
|---------------------------------------------|----------------|------------------------|-----------------------|
|                                             | (N=2187)       | (N=4074)               |                       |
|                                             | n (%)          | n (%)                  |                       |
| Age, years                                  |                |                        | 0.513                 |
| 18-24                                       | 643 (29.4)     | 1232 (30.2)            |                       |
| 25-44                                       | 1240 (56.7)    | 2315 (56.8)            |                       |
| 45-70                                       | 304 (13.9)     | 527 (12.9)             |                       |
| Country                                     |                |                        | <b>0.003</b>          |
| Brazil                                      | 819 (37.4)     | 1401 (34.4)            |                       |
| Mexico                                      | 735 (33.6)     | 1330 (32.6)            |                       |
| US                                          | 633 (28.9)     | 1343 (33.0)            |                       |
| Marital                                     |                |                        | 0.719                 |
| Single                                      | 975 (44.7)     | 1838 (45.2)            |                       |
| Cohabiting                                  | 280 (12.8)     | 484 (11.9)             |                       |
| Married                                     | 744 (34.1)     | 1384 (34.1)            |                       |
| Divorced/Widowed                            | 183 ( 8.4)     | 357 ( 8.8)             |                       |
| Education                                   |                |                        | 0.717                 |
| Less than high school                       | 464 (21.3)     | 900 (22.2)             |                       |
| High School graduate                        | 593 (27.2)     | 1089 (26.8)            |                       |
| College or higher                           | 1124 (51.5)    | 2071 (51.0)            |                       |
| Alcohol drinking <sup>a</sup>               |                |                        | 0.722                 |
| Light                                       | 692 (43.2)     | 1281 (43.9)            |                       |
| Moderate                                    | 574 (35.8)     | 1012 (34.6)            |                       |
| Heavy                                       | 336 (21.0)     | 628 (21.5)             |                       |
| Cigarette smoking                           |                |                        | 0.444                 |
| Never                                       | 1271 (58.2)    | 2348 (57.8)            |                       |
| Current                                     | 489 (22.4)     | 963 (23.7)             |                       |
| Former                                      | 422 (19.3)     | 751 (18.5)             |                       |
| Circumcision <sup>b</sup>                   |                |                        | 0.070                 |
| No                                          | 1437 (65.7)    | 2583 (63.4)            |                       |
| Yes                                         | 750 (34.3)     | 1491 (36.6)            |                       |
| Sexual practice                             |                |                        | 0.798                 |
| MSW                                         | 1953 (89.3)    | 3429 (89.7)            |                       |
| MSM                                         | 109 ( 5.0)     | 176 ( 4.6)             |                       |
| MSMW                                        | 125 ( 5.7)     | 217 ( 5.7)             |                       |
| Lifetime female sex partners among MSW, no. |                |                        | 0.597                 |

|                                                 |             |             |       |
|-------------------------------------------------|-------------|-------------|-------|
| None                                            | 2 ( 0.1)    | 3 ( 0.1)    |       |
| 1-3                                             | 510 (27.8)  | 835 (26.1)  |       |
| 4-17                                            | 876 (47.8)  | 1574 (49.1) |       |
| >=18                                            | 446 (24.3)  | 792 (24.7)  |       |
| Lifetime male anal sex partners, no.            |             |             | 0.366 |
| None                                            | 1829 (85.1) | 3480 (86.6) |       |
| 1-2                                             | 149 ( 6.9)  | 238 ( 5.9)  |       |
| 3-10                                            | 96 ( 4.5)   | 168 ( 4.2)  |       |
| >=11                                            | 76 ( 3.5)   | 132 ( 3.3)  |       |
| New sex partners in past 6 mo, no.              |             |             | 0.445 |
| None                                            | 1335 (61.4) | 2530 (62.4) |       |
| 1                                               | 555 (25.5)  | 976 (24.1)  |       |
| ≥2                                              | 285 (13.1)  | 548 (13.5)  |       |
| Frequency of vaginal sex in past 6 mos.         |             |             | 0.625 |
| <1 per week                                     | 724 (46.6)  | 1339 (48.1) |       |
| 1-2 per week                                    | 402 (25.9)  | 712 (25.6)  |       |
| >2 per week                                     | 427 (27.5)  | 735 (26.4)  |       |
| Condom use in vaginal sex in past 6 mos.        |             |             | 0.312 |
| Always                                          | 447 (23.9)  | 723 (22.0)  |       |
| Frequently                                      | 433 (23.2)  | 749 (22.8)  |       |
| Sometimes                                       | 256 (13.7)  | 490 (14.9)  |       |
| Never                                           | 732 (39.2)  | 1323 (40.3) |       |
| Condom use in anal sex in past 6 mos.           |             |             | 0.884 |
| Always                                          | 235 (33.7)  | 391 (32.0)  |       |
| Frequently                                      | 121 (17.3)  | 211 (17.3)  |       |
| Sometimes                                       | 69 ( 9.9)   | 122 (10.0)  |       |
| Never                                           | 273 (39.1)  | 497 (40.7)  |       |
| Condom use in sexual intercourse in past 6 mos. |             |             | 0.425 |
| Always                                          | 376 (22.9)  | 644 (21.1)  |       |
| Frequently                                      | 362 (22.1)  | 657 (21.5)  |       |
| Sometimes                                       | 195 (11.9)  | 385 (12.6)  |       |
| Never                                           | 708 (43.1)  | 1364 (44.7) |       |
| History of other STIs <sup>c</sup>              |             |             | 0.367 |
| No                                              | 1783 (81.6) | 3356 (82.5) |       |
| Yes                                             | 402 (18.4)  | 711 (17.5)  |       |

† p values were derived from Pearson chi-squared test statistics. Bolded p values denote statistical significance.  
a. Light drinking was defined as <half a drink per day; moderate drinking as one half to 2 drinks per day; and heavy drinking as >2 drinks per day on average.  
b. Circumcision status was assessed by study clinician.  
c. Other STIs: Chlamydia, HSV, genital warts, Gonorrhea, Hepatitis B, Hepatitis C, non-gonococcal urethritis, Syphilis

**Appendix B: Association of incident HPV 16 infection and 6-month persistent HPV 16 infection with baseline serum antibody level (continuous) among 2187 men in Tampa, Cuernavaca and São Paulo.**

|                                     | Overall |             |                   |             | MSW  |             |                   |             | MSM  |             |                   |             |
|-------------------------------------|---------|-------------|-------------------|-------------|------|-------------|-------------------|-------------|------|-------------|-------------------|-------------|
|                                     | HR      | 95% CI      | Adjusted HR       | 95% CI      | HR   | 95% CI      | Adjusted HR       | 95% CI      | HR   | 95% CI      | Adjusted HR       | 95% CI      |
| <b>Incident Infection</b>           |         |             |                   |             |      |             |                   |             |      |             |                   |             |
| Per log(OD) increase                | 1.18    | (0.99-1.41) | 1.16 <sup>a</sup> | (0.97-1.39) | 1.15 | (0.93-1.43) | 1.27 <sup>b</sup> | (0.99-1.61) | 1.04 | (0.76-1.43) | 1.18 <sup>c</sup> | (0.85-1.64) |
| <b>6-month Persistent Infection</b> |         |             |                   |             |      |             |                   |             |      |             |                   |             |
| Per log(OD) increase                | 1.05    | (0.76-1.44) | 1.10 <sup>d</sup> | (0.79-1.52) | 1.06 | (0.73-1.54) | 1.06 <sup>e</sup> | (0.71-1.57) | 0.92 | (0.48-1.78) | 1.20 <sup>f</sup> | (0.60-2.39) |

HR: Hazard Ratio. CI: Confidence interval. MSW: Men who had sex with women. MSM: Men who had sex with men or men who had sex with men and women.

a. Adjusted for age at enrollment, sexual practice (MSW and MSM) and lifetime number of sex partners.

b. Adjusted for age at enrollment and lifetime number of female sex partners.

c. Adjusted for age at enrollment and circumcision status.

d. Adjusted for age at enrollment, sexual practice (MSW and MSM) and the number of new sex partners in past 6 months.

e. Adjusted for age at enrollment and the number of new sex partners in past 6 months.

f. Adjusted for age at enrollment.
